# Supplementary material
Source: publisher figshare collection journal article supplement (https://acs.figshare.com/ndownloader/files/4195762)
Supplement: Supplementary file 1 [file 4195762]

## Supporting Information

### Ternary Asymmetric Particles with Controllable Patchiness

Zhiyuan Zhao, Zengmin Shi, Ye Yu, and Gang Zhang\*

*State Key Lab of Supramolecular Structure and Materials, College of Chemistry, Jilin University,  
Changchun 130012, P.R. China.*

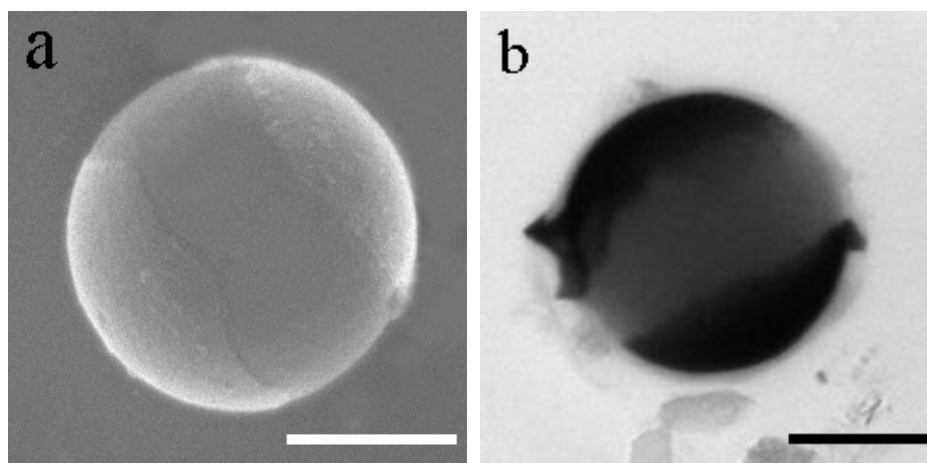

**Figure S1** SEM (a) and TEM (b) image of the ternary asymmetric particles modified by Au and Ni via double-sided etching and modifying method after annealing at 500 °C. Scale bars: 1.0  $\mu\text{m}$ .

---

\*Corresponding Author. E-mail: gang@jlu.edu.cn.

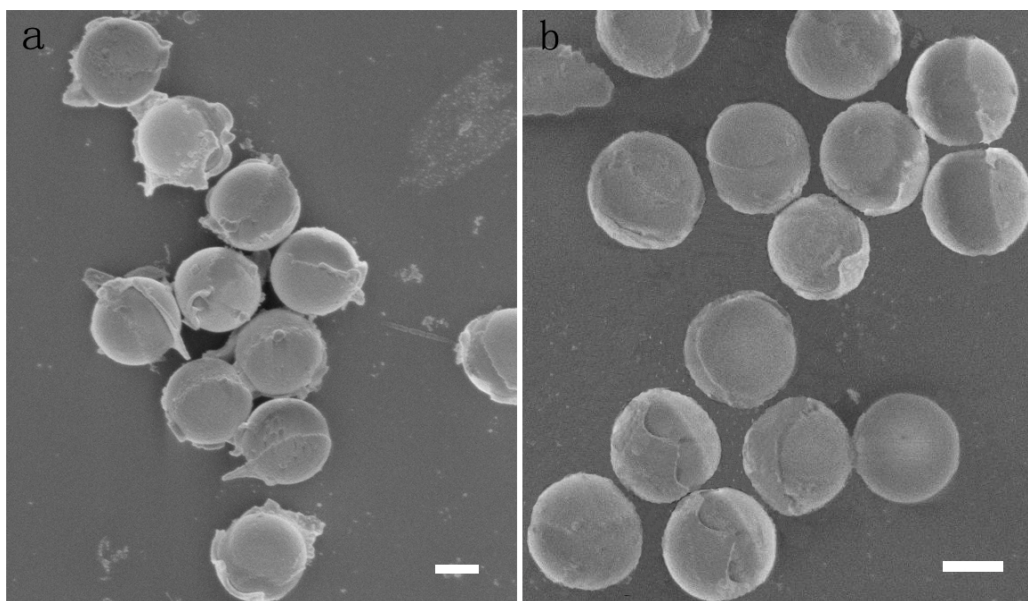

**Figure S2** SEM images of the ternary asymmetric particles structure modified with Au via double-modifying and peeling off, release on another substrate, and shown (a) before annealing with overhang and (b) without overhang after annealing at 500 °C. Scale bars: 1.0  $\mu\text{m}$ .

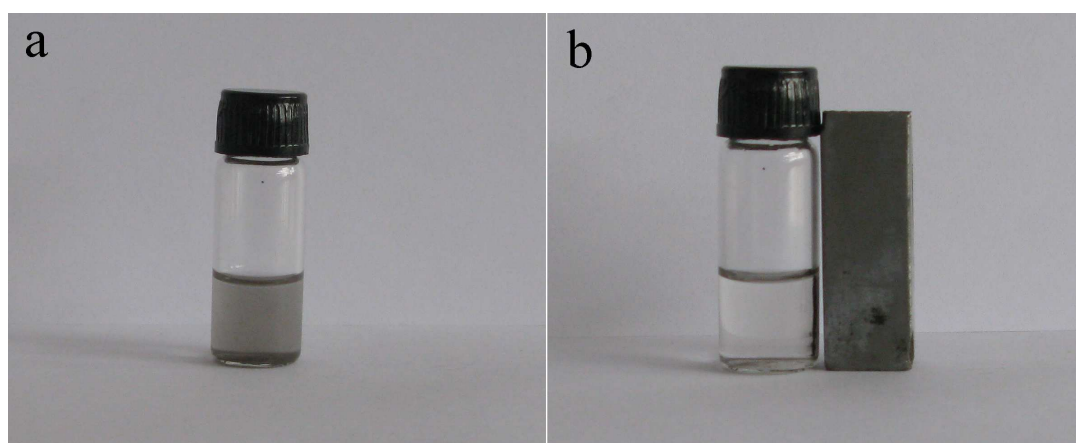

**Figure S3** Photographs of the ternary asymmetric particles modified using Au and Ni (A) without magnetic field, (B) with magnetic field.
